# Supplementary material
Source: Springer Nature journal article supplement (https://www.springermedizin.de/resource/supplementary/12916_2009_245_MOESM3_ESM.pdf/9599482)
Supplement: MOESM3 [file 9599482]

Children randomised  
(n=339)

Tygerberg Children's Hospital (n=164)

Red Cross Children's Hospital (n=175)

Allocated to  
Thrice Weekly  
(n=84)

Allocated to  
Daily  
(n=80)

Allocated to  
Thrice Weekly  
(n=84)

Allocated to  
Daily  
(n=91)

Censored prior to  
October 2003  
(n=6):

Reasons:  
Did not have HIV  
(n=2)  
Died (n=3)  
Lost to follow up  
(n=0)  
Withdrew (n=1)

Censored prior to  
October 2003  
(n=16):

Reasons:  
Did not have HIV  
(n=5)  
Died (n=5)  
Lost to follow up  
(n=5)  
Withdrew (n=1)

Censored prior to  
October 2003  
(n=9):

Reasons:  
Did not have HIV  
(n=0)  
Died (n=7)  
Lost to follow up  
(n=2)  
Withdrew (n=0)

Censored prior to  
October 2003  
(n=14):

Reasons:  
Did not have HIV  
(n=3)  
Died (n=6)  
Lost to follow up  
(n=3)  
Withdrew (n=2)

No adherence  
measures (n=1)

No adherence  
measures (n=3)

No adherence  
measures (n=4)

No adherence  
measures (n=10)

Analyzed (n=77)

Analyzed (n=61)

Analyzed (n=71)

Analyzed (n=67)
